# Supplementary material for: Tunable “soft and stiff”, self-healing, recyclable, thermadapt shape memory biomass polymers based on multiple hydrogen bonds and dynamic imine bonds
Source: Royal Society of Chemistry journal article supplement (doi:10.1039/c9ta03872h), 2019-01-01
Supplement: c9ta03872h5.pdf [file c9ta03872h5.pdf]

## Supporting Information

### **Tunable “soft and stiff”, self-healable, recyclable, thermadapt shape-memory biomass polymer based on multiple hydrogen bonds and dynamic imine bondss**

Fei Song, Zhaoshuang Li, Puyou Jia,\* Meng Zhang, Caiying Bo, Guodong Feng, Lihong Hu and Yonghong Zhou\*

Institute of Chemical Industry of Forest Products, Chinese Academy of Forestry (CAF); Co-Innovation Center of Efficient Processing and Utilization of Forest Resources, Nanjing Forestry University; and Key Lab of Biomass Energy and Materials, Jiangsu Province, 16 Suojin North Road, Nanjing 210042, P. R. China. Song F and Li Z contributed equally to this work.

\*Corresponding author Email: yhzhou777@sina.com (Y.Z.), jiapuyou@icifp.cn (P.J).

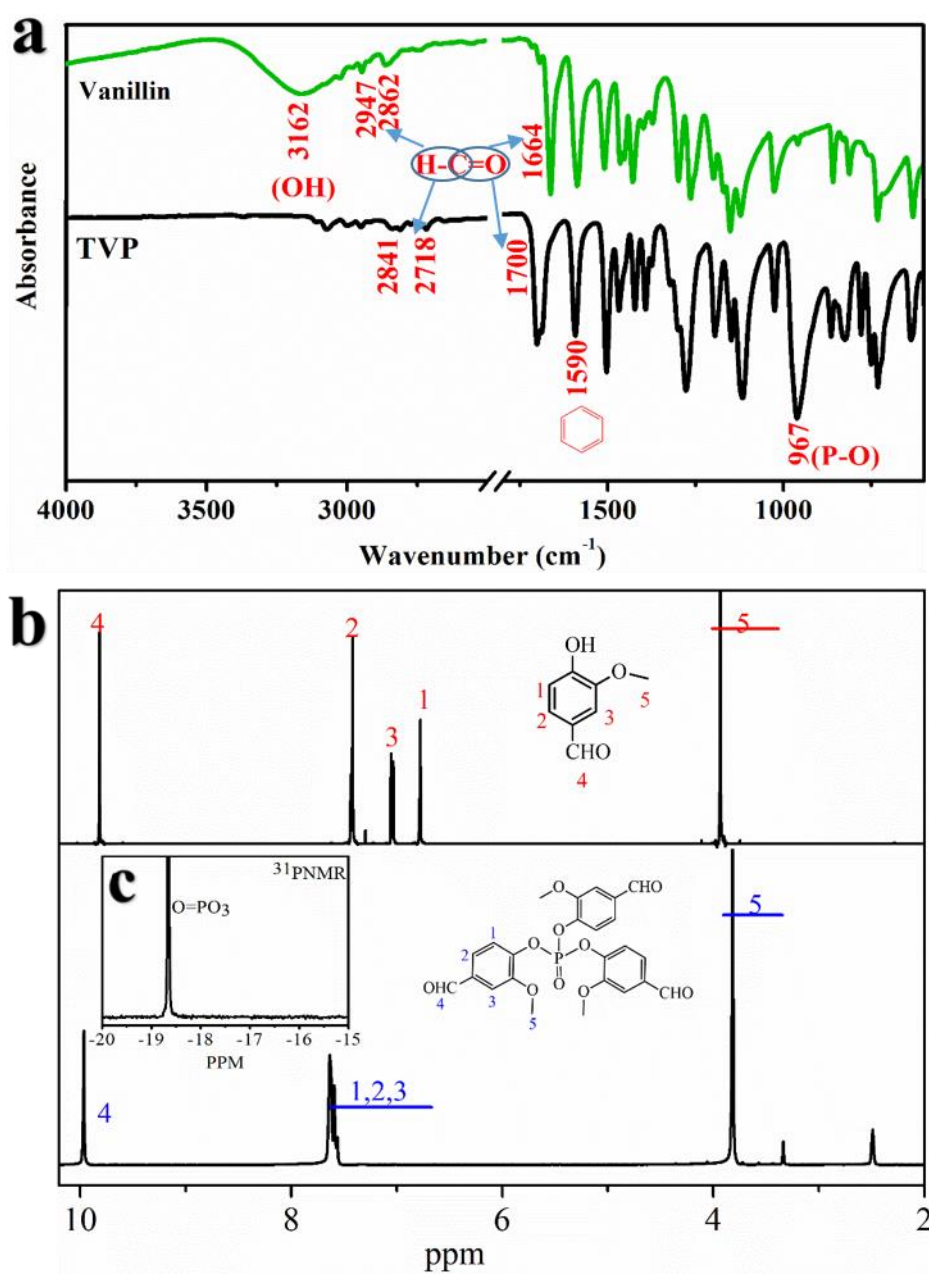

**Figure S1.** FTIR (a) and  $^1\text{H}$  NMR (b) for vanillin and TVP, and  $^{31}\text{P}$  NMR (c) spectrum for TVP.

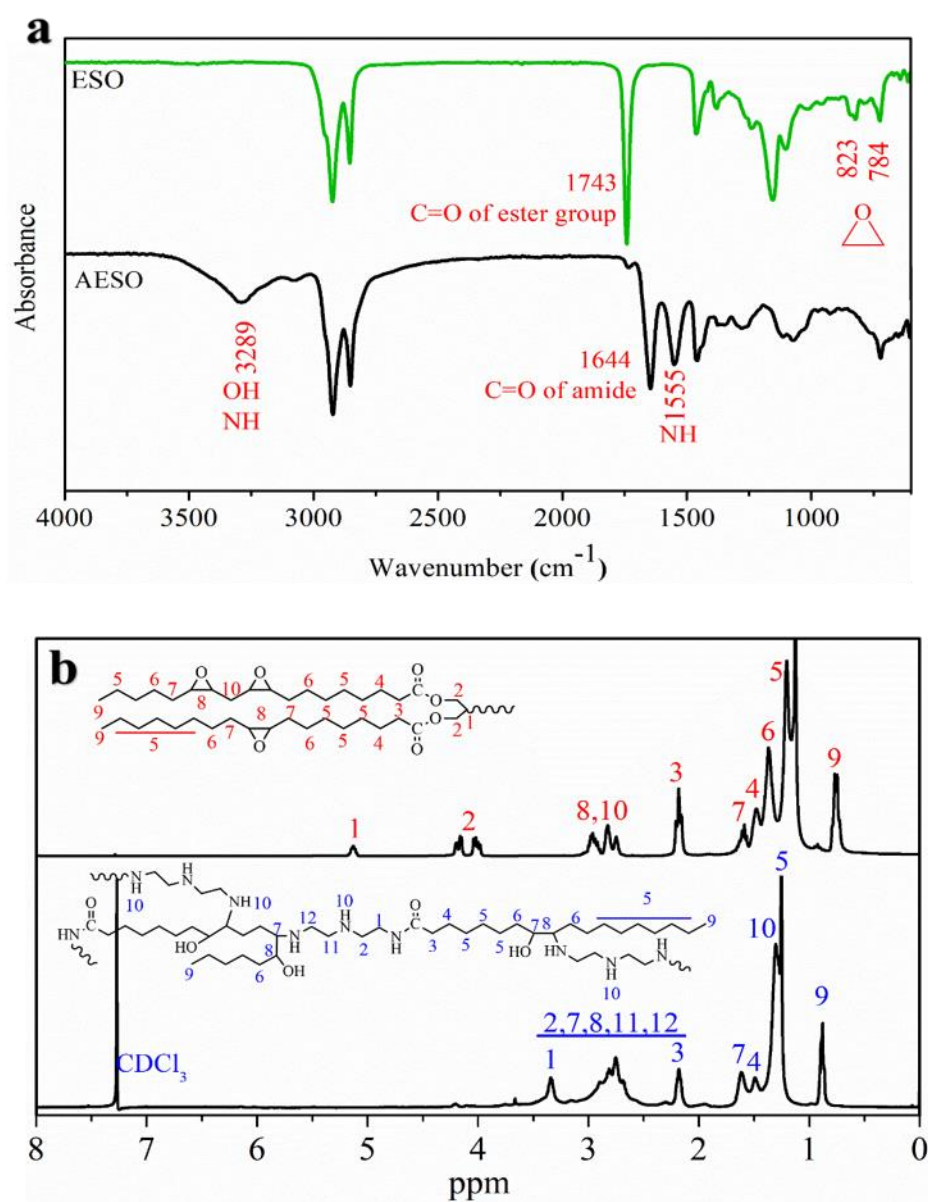

**Figure S2.** FTIR (a) and  $^1\text{H}$  NMR (b) spectrum for ESO and EASO.

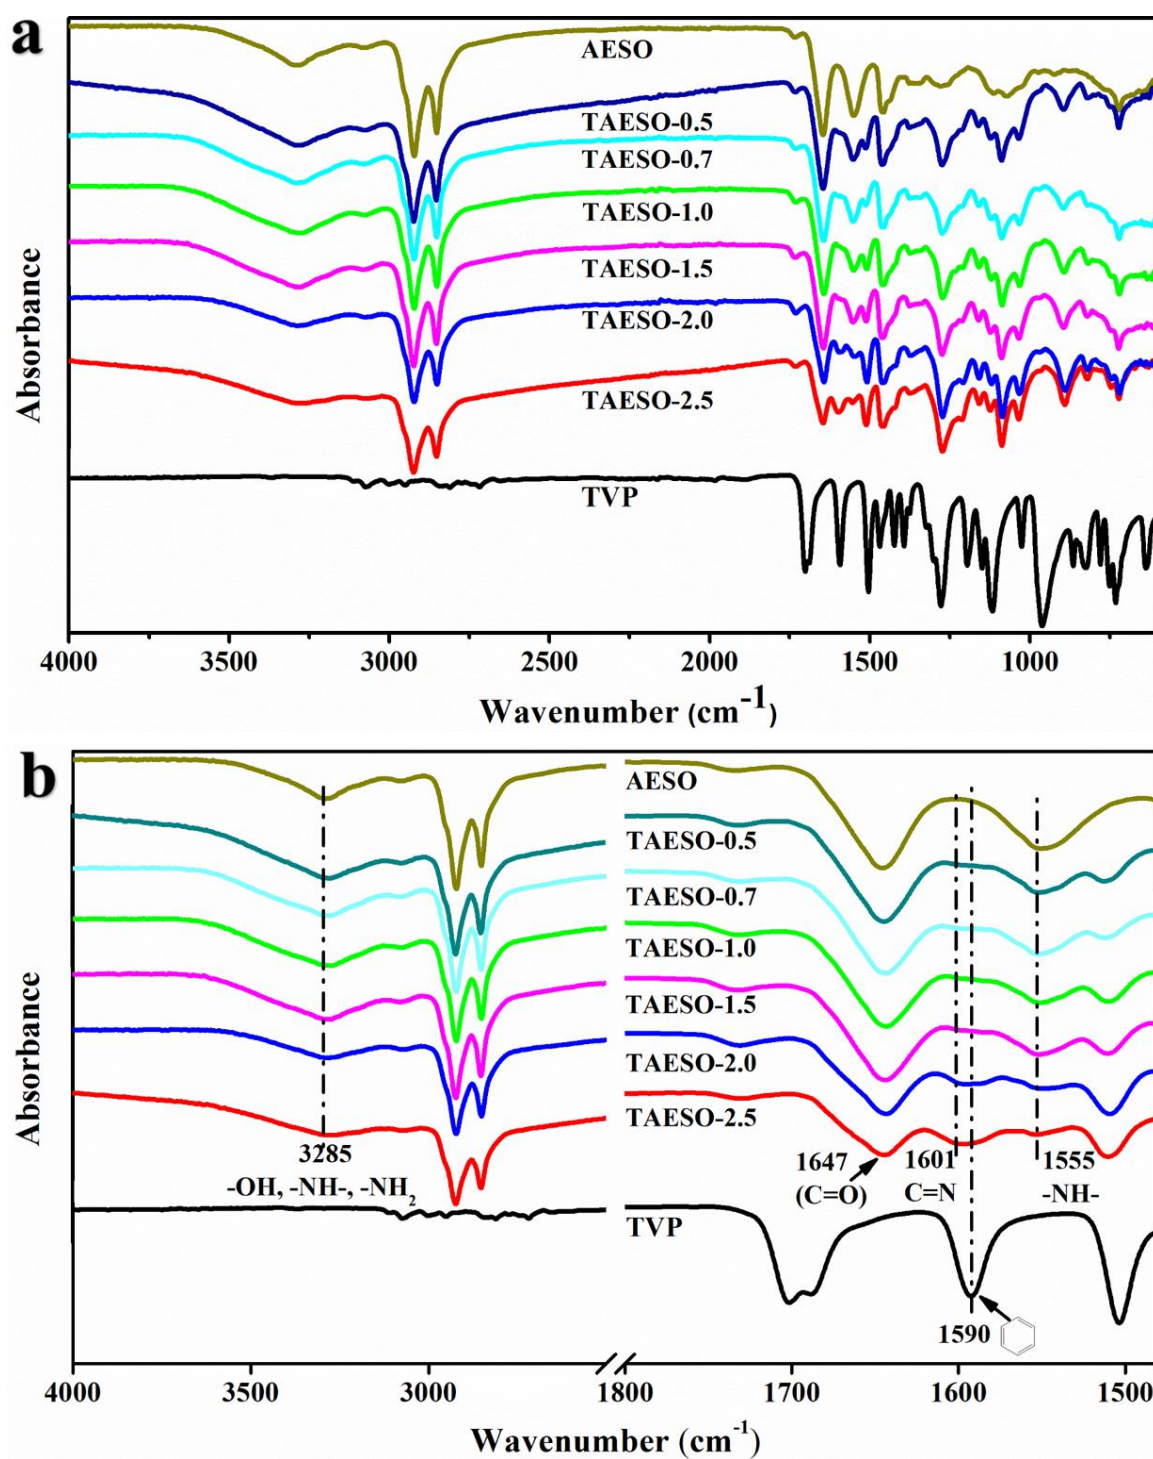

**Figure S3.** FT-IR spectra (a) and enlarged spectra (b) of AESO, TVP, and the TAESO obtained from different weight ratio TVP /AESO.



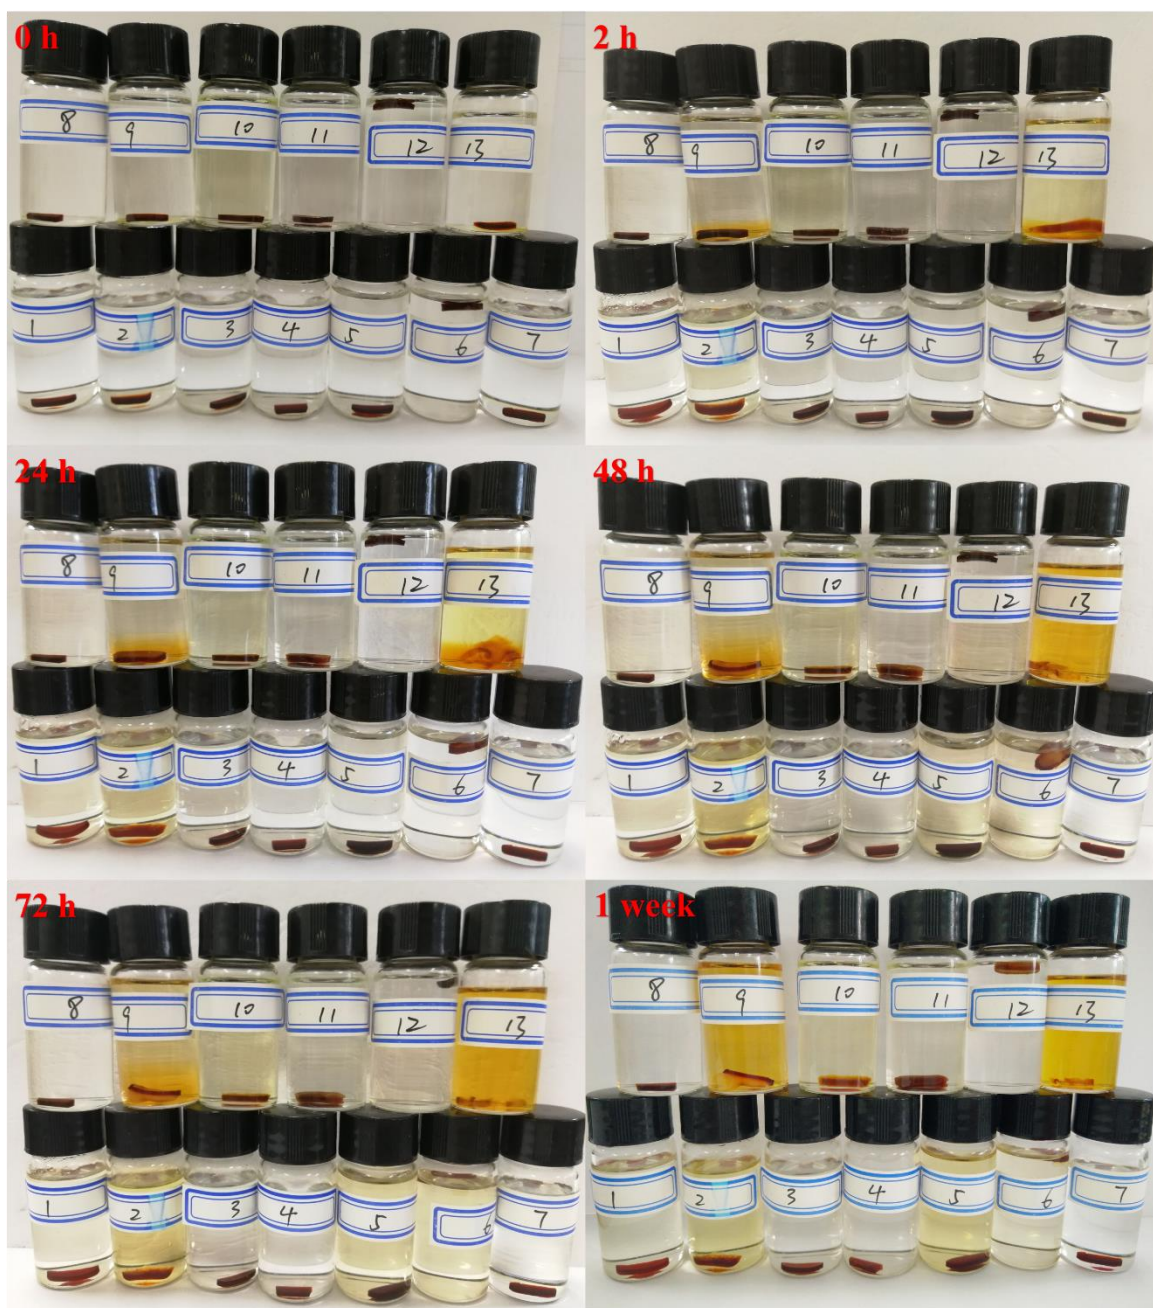

**Figure S4.** The dissolution experiments for the TAESO-2.5 polymer. It shows that the polymer different levelly swells in solvent 2, 5, 6, 9, 10 and 11, completely dissolve in solvent 13. The corresponding solvents are as followed: 1. Tetrahydrofuran, 2. Dimethyl formamide, 3. Ethyl acetate, 4. Ether, 5. Acetone, 6. Dichloromethane, 7. Toluene, 8. Petroleum ether , 9. Ethanol, 10. Soybean oil 11. 1 mol/L HCl solution, 12. 30 wt % KOH solution, 13. Acetic acid.

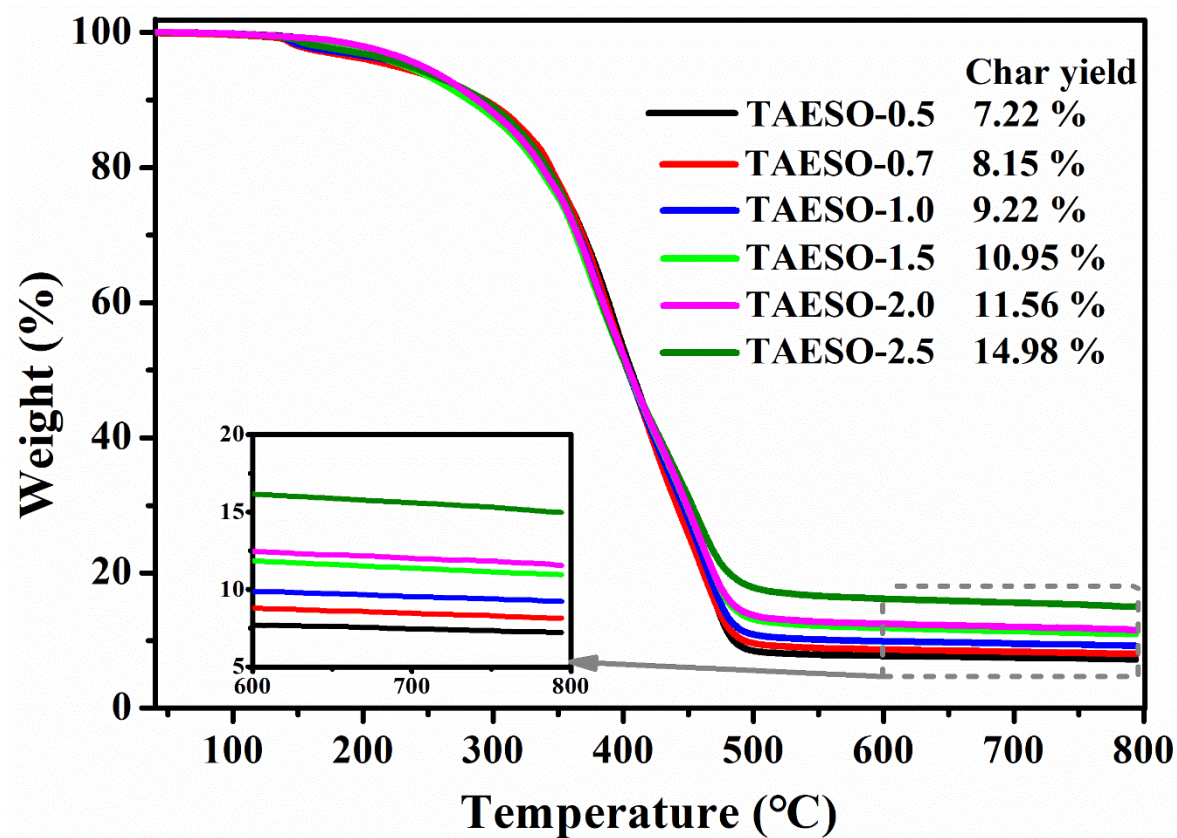

**Figure S5.** The TGA curves of the TAESO polymer different weight ratio TVP /AESO.

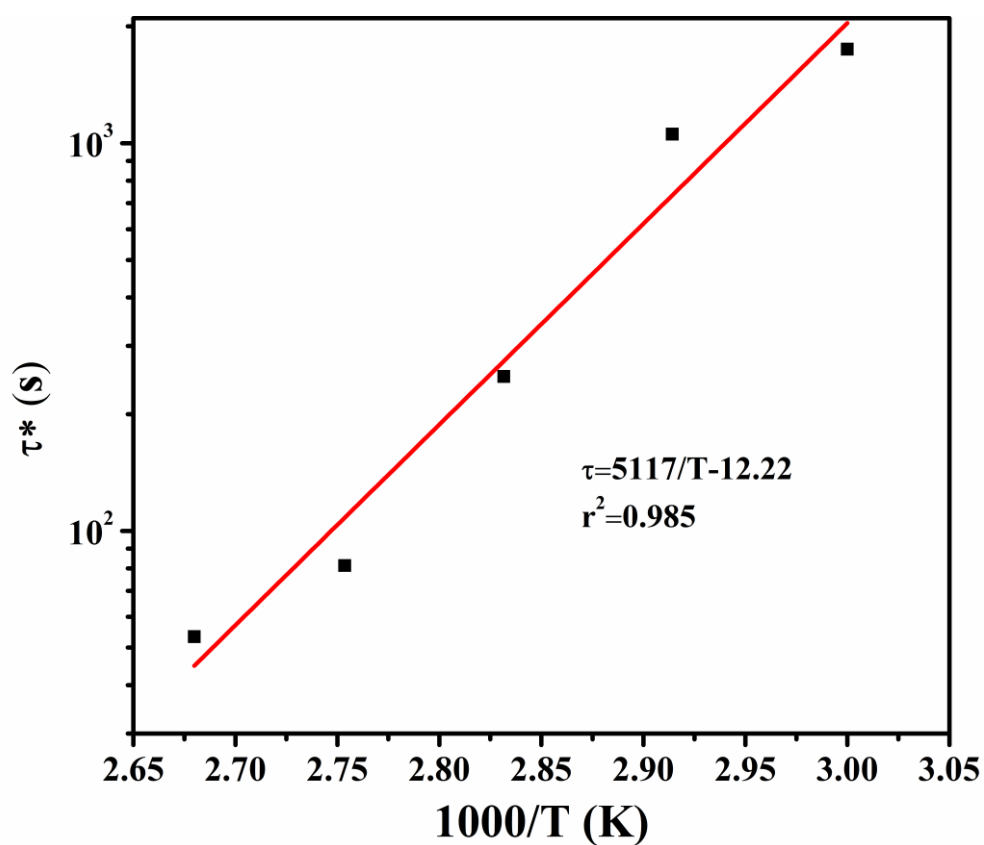

**Figure S6.** The relaxation time ( $\tau$ ) variation as a function of  $1/T$ , which followed a simple Arrhenius law:

$$\tau^*(T) = \tau_0 \exp(E_a/RT)$$

with  $\tau^*$  the relaxation time (s),  $\tau_0$  a constant (s),  $E_a$  the activation energy ( $\text{J} \cdot \text{mol}^{-1}$ ),  $R$  the ideal gas constant ( $\text{J} \cdot \text{mol}^{-1} \cdot \text{K}^{-1}$ ) and  $T$  the temperature (K). The activation energy  $E_a$ , as calculated from the slope ( $E_a/R$ ), was  $43 \text{ kJ} \cdot \text{mol}^{-1}$ .





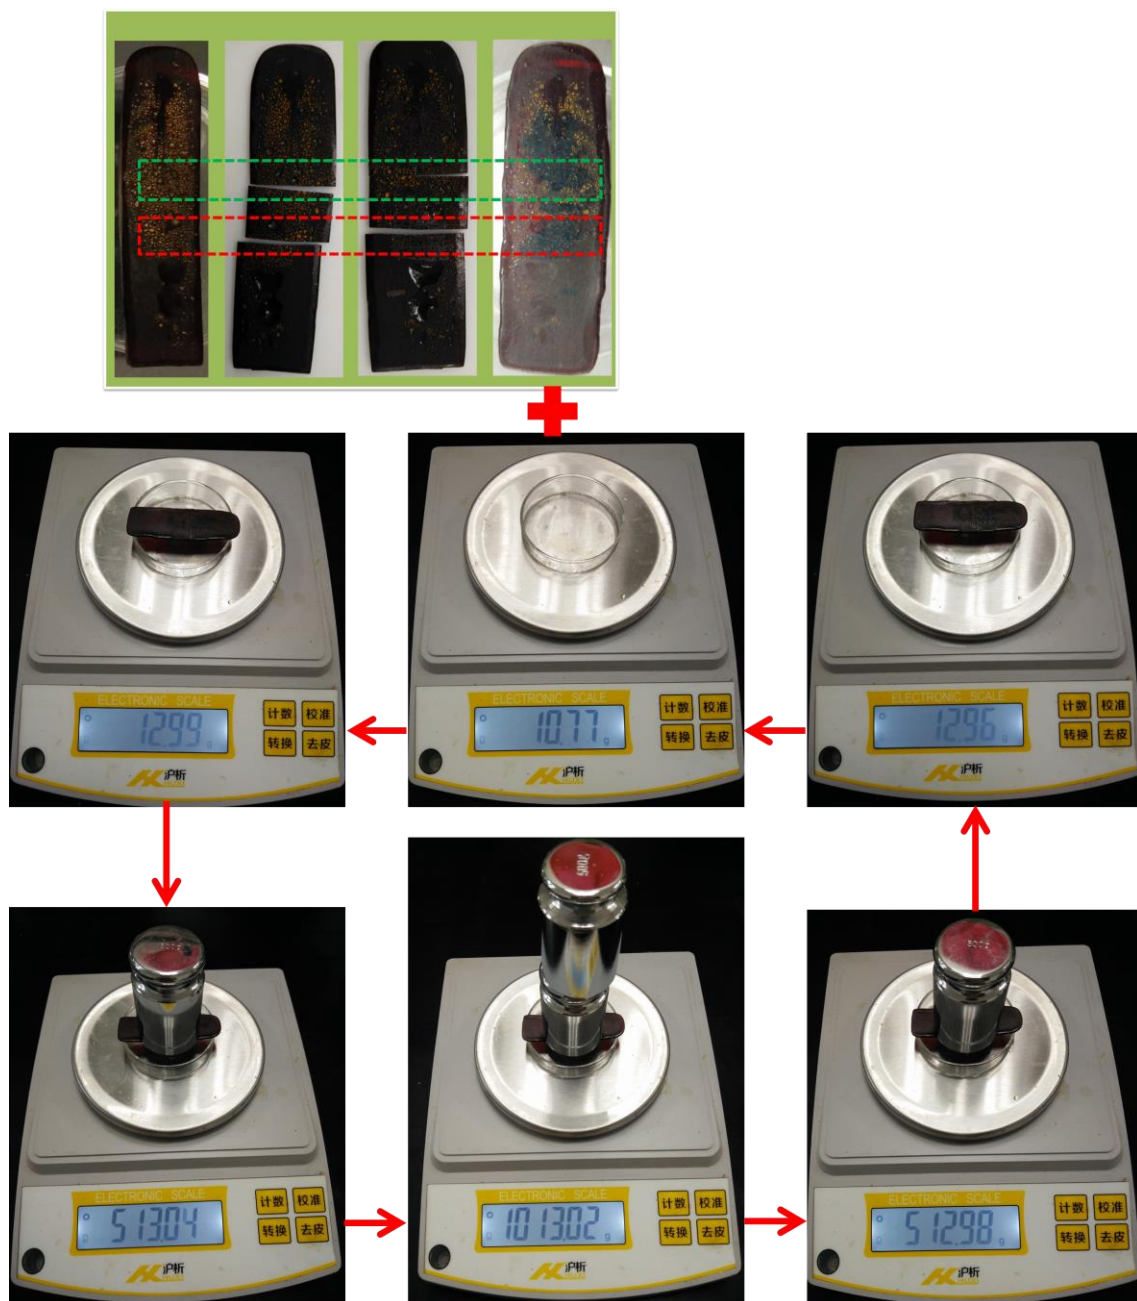

**Figure S8.** The weight-bearing test of self-healed TAESO-2.5.

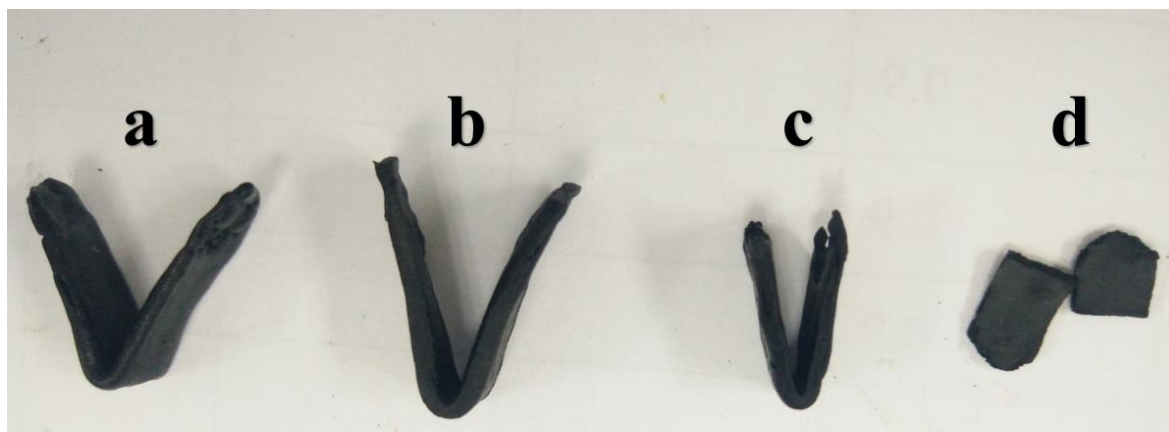

**Figure S9.** Photographs of composites with different weight ratios of MWCNTs. **a**, 5.0 wt%; **b**, 10.0 wt%; **c**, 15.0 wt%; **d**, 20.0 wt%.

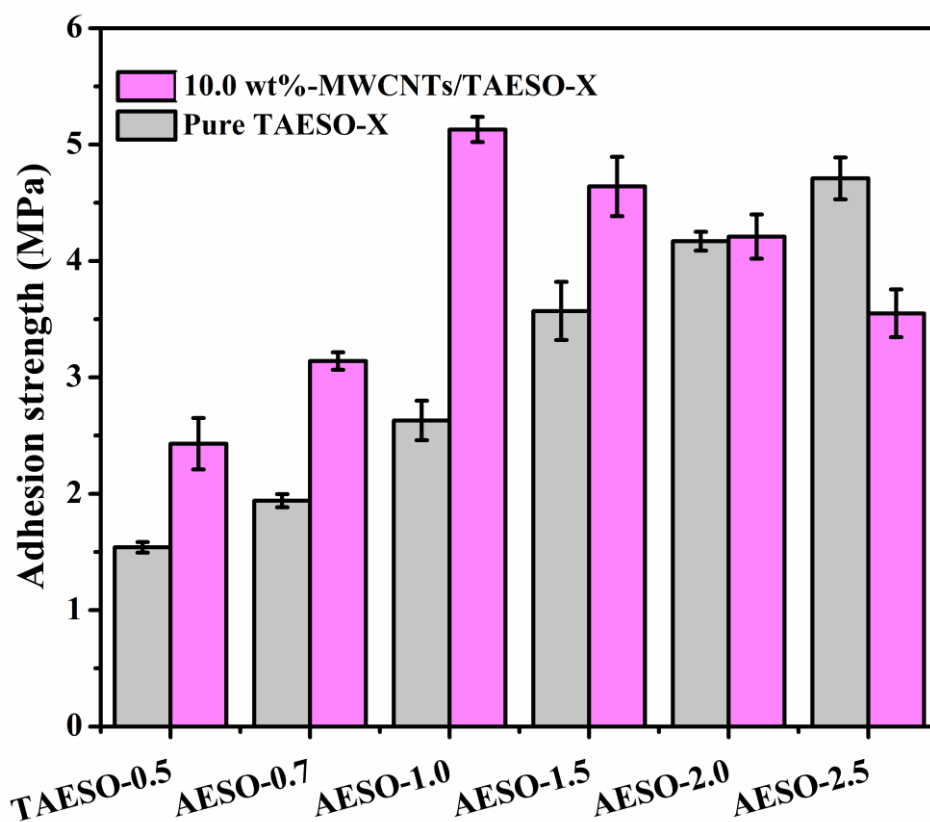

**Figure S10.** Shear strength of the TAESO-X and 10.0 wt%-MWCNTs/TAESO-X composite.

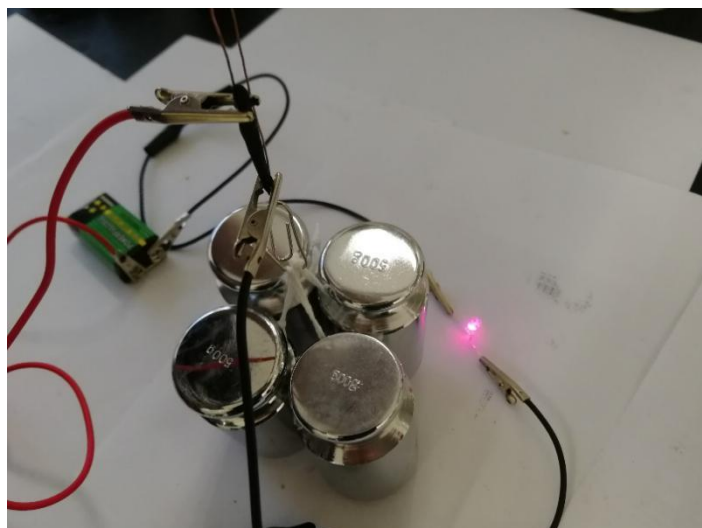

**Figure S11.** A circuit that glued and conducted by 10.0 wt%-MWCNTs/TAESO-1.0 composite could sustain a weight of 2 kg.

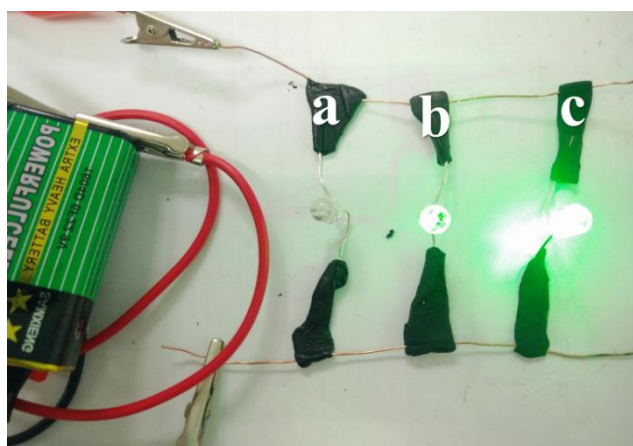

**Figure S12.** Photographs of the parallel circuit of composites with different weight ratios of MWCNTs. **a**, 5.0 wt%; **b**, 10.0 wt%; **c**, 15.0 wt%.

**Table S1.** The mechanical properties of TAESO.

|                         | <b>Sample<br/>(mean <math>\pm</math> s.d., n=4)</b> | <b>Maximal strength<br/>(MPa)</b> | <b>Breaking strain<br/>(%)</b> |
|-------------------------|-----------------------------------------------------|-----------------------------------|--------------------------------|
| Tensile testing<br>mode | TAESO-0.5                                           | $0.63 \pm 0.055$                  | >2800                          |
|                         | TAESO-0.7                                           | $1.74 \pm 0.079$                  | $832.57 \pm 88.32$             |
|                         | TAESO-1.0                                           | $3.20 \pm 0.19$                   | $464.26 \pm 28.17$             |
|                         | TAESO-1.5                                           | $7.74 \pm 0.33$                   | $30.74 \pm 5.33$               |
|                         | TAESO-2.0                                           | $18.55 \pm 0.24$                  | $21.29 \pm 2.17$               |
|                         | TAESO-2.5                                           | $20.50 \pm 0.23$                  | $12.43 \pm 2.49$               |
| Bend testing<br>mode    | TAESO-1.5                                           | $9.77 \pm 0.42$                   | $2.39 \pm 0.26$                |
|                         | TAESO-2.0                                           | $20.97 \pm 0.79$                  | $2.24 \pm 0.42$                |
|                         | TAESO-2.5                                           | $25.51 \pm 2.56$                  | $2.03 \pm 0.33$                |

**Table S2.** The healing efficiency of TAESO-2.5 with various healing time and healing temperature.

| Healing time<br>(100 °C, h)       | Maximal strength<br>(MPa, mean $\pm$ s.d., n=4) | Healing Efficiency<br>( %, mean $\pm$ s.d., n=4) |
|-----------------------------------|-------------------------------------------------|--------------------------------------------------|
| Original                          | 20.50 $\pm$ 0.23                                | -                                                |
| 12                                | 19.11 $\pm$ 0.72                                | 93.22 $\pm$ 3.50                                 |
| 8                                 | 17.87 $\pm$ 0.46                                | 87.17 $\pm$ 2.22                                 |
| 4                                 | 11.20 $\pm$ 0.25                                | 54.63 $\pm$ 1.25                                 |
| 1                                 | 5.77 $\pm$ 0.17                                 | 28.15 $\pm$ 0.84                                 |
| Healing temperature<br>(12 h, °C) | Maximal strength<br>(MPa, mean $\pm$ s.d., n=4) | Healing Efficiency<br>( %, mean $\pm$ s.d., n=4) |
| Original                          | 20.50 $\pm$ 0.23                                | -                                                |
| 100                               | 19.11 $\pm$ 0.72                                | 93.22 $\pm$ 3.50                                 |
| 70                                | 17.25 $\pm$ 0.48                                | 87.21 $\pm$ 2.36                                 |
| 60                                | 12.78 $\pm$ 0.71                                | 62.34 $\pm$ 3.48                                 |
| 50                                | 6.43 $\pm$ 0.32                                 | 31.36 $\pm$ 1.56                                 |
| 40                                | 3.58 $\pm$ 0.15                                 | 17.46 $\pm$ 0.34                                 |

**Movie S1.** Thermally induced shape recovery of permanent strip sample.

**Movie S2.** Thermally induced shape recovery of reconfigured permanent spring shape.

**Movie S3.** Two sanded steel substrates bonded by TAESO-2.5 can withstand a full force of 26.6 kg (approximately equal to 260.9 N).

**Movie S4.** The parallel circuit of composites with different weight ratios of MWCNTs. From left to right is 5.0 wt%, 10.0 wt% and 15.0 wt%.
